# Supplementary material for: Enhanced charge separation of vertically aligned CdS/g-C3N4 heterojunction nanocone arrays and corresponding mechanisms
Source: Royal Society of Chemistry journal article supplement (doi:10.1039/c6tc02110g), 2016-01-01
Supplement: c6tc02110g1.pdf [file c6tc02110g1.pdf]

Table S-1 The measured and calculated values of the main crystal plane spacing (d) and dihedral angles ( $\theta$ ) and their deviations (resulted from SAED)

|                                     |                  | Location       | Parameter      | Measured value | Theoretical value | (hkl)  | Error  | Zone axis |
|-------------------------------------|------------------|----------------|----------------|----------------|-------------------|--------|--------|-----------|
| <b>g-C<sub>3</sub>N<sub>4</sub></b> | <b>a:4.472 Å</b> | Top            | d <sub>1</sub> | 3.258          | 3.361             | 002    | 3.064% | [100]     |
|                                     |                  |                | d <sub>2</sub> | 2.035          | 2.053             | 020    | 0.876% |           |
|                                     |                  |                | d <sub>3</sub> | 1.733          | 1.752             | 022    | 1.084% |           |
|                                     |                  |                | $\theta_1$     | 59.1°          | 58.6°             | -      | 0.853% |           |
|                                     |                  |                | $\theta_2$     | 90.3°          | 90°               | -      | 0.333% |           |
| <b>c:6.721 Å</b>                    | body             | d <sub>1</sub> | 3.256          | 3.361          | 002               | 3.124% | [100]  |           |
|                                     |                  | d <sub>2</sub> | 2.022          | 2.053          | 020               | 1.509% |        |           |
|                                     |                  | d <sub>3</sub> | 1.738          | 1.752          | 022               | 0.799% |        |           |
|                                     |                  | $\theta_1$     | 59.4°          | 58.6°          | -                 | 1.365% |        |           |
|                                     |                  | $\theta_2$     | 90.2°          | 90°            | -                 | 0.222% |        |           |

**d<sub>1</sub>, d<sub>2</sub> and d<sub>3</sub> represent crystal interplanner spacings that meet vector superposition principle (Å)**  
 **$\theta_1$  represents the angle between d<sub>1</sub> and d<sub>3</sub> (°)**  
 **$\theta_2$  represents the angle between d<sub>1</sub> and d<sub>2</sub> (°)**
